# Supplementary material for: The biological role of N-acyl-homoserine lactone-based quorum sensing (QS) in EPS production and microbial community assembly during anaerobic granulation process
Source: PubMed Central journal article supplement (PMC6202354; doi:10.1038/s41598-018-34183-3), 2018-10-25
Supplement: 41598_2018_34183_MOESM1_ESM.pdf [file 41598_2018_34183_MOESM1_ESM.pdf]

1 **Supplementary material**

2 **The biological role of N-acyl-homoserine lactone-based**  
3 **quorum sensing (QS) in EPS production and microbial**  
4 **community assembly during anaerobic granulation process**

5

6

7

8 Haijun Ma, Sijia Ma, Haidong Hu, Lili Ding, Hongqiang Ren\*

9

10

11

12 State Key Laboratory of Pollution Control and Resource Reuse, School of the

13 Environment, Nanjing University, Nanjing 210023, Jiangsu, PR China

14

15

16

17

18

19 \*Corresponding author: Hongqiang Ren; Tel: +86 25 89680512;

20 fax: +86 25 89680569. E-mail address: hqren@nju.edu.cn

21

## 22 **Materials and methods**

23 **Bioinformatics analysis** The raw read1 and read2 datasets were demultiplexed  
24 by trimming the barcode sequences with no more than 1 mismatch. Then the  
25 sequences with the same ID were picked from the remaining read1 and read2  
26 datasets by a self-written python script. Bases with average quality score lower  
27 than 25 over a 25 bases sliding window were excluded and sequences which  
28 contained any ambiguous base or had a final length shorter than 200 bases were  
29 abandoned using Sickle [1]. The paired reads were assembled into contigs and  
30 any contigs with an ambiguous base, more than 8 homopolymeric bases and  
31 fewer than 10 bp overlaps were culled. After that, the contigs were further  
32 trimmed to get rid of the contigs that have more than 1 forward primer mismatch  
33 and 2 reverse primer mismatch. The primer sequences were trimmed off. Then  
34 the sequences that were the same with each other were merged as one unique  
35 sequence to accelerate the filtering calculation. The remaining unique sequences  
36 were aligned using SILVA bacterial reference database. Afterwards, the  
37 sequences that did not align to the correct region were excluded [2]. Both ends  
38 of the sequences were trimmed to ensure that all the sequences started and ended  
39 at the same position. Additionally, a preclustering algorithm was employed to  
40 merge sequences by allowing 1 bp difference for every 100 bp [3]. Chimeras  
41 were screened and removed from the resulting sequences using Uchime  
42 packaged in Mothur [4]. All the datasets were normalized to 14545 sequences by  
43 the “sub.sample” command. The filtered sequences were classified against the

44 SILVA 16S reference database (version 128) using a naïve Bayesian classifier  
45 built in Mothur with an 80% confidence score [5]. Sequences passing through all  
46 the filtration were also clustered into OTUs at 3% dissimilarity level. Then a  
47 “classify.otu” function was utilized to assign the phylogenetic information to  
48 each OTU.

#### 49 **Supplementary References**

- 50 1. Joshi NA, FJ. 2011. Sickle: A sliding-window, adaptive, quality-based trimming  
51 tool for FastQ files (Version 1.33) [Software].
- 52 2. Schloss PD. 2010. The Effects of Alignment Quality, Distance Calculation Method,  
53 Sequence Filtering, and Region on the Analysis of 16S rRNA Gene-Based Studies.  
54 *Plos Comput. Biol.* **6**: e1000844.
- 55 3. Kozich JJ, Westcott SL, Baxter NT, Highlander SK, Schloss PD. 2013.  
56 Development of a Dual-Index Sequencing Strategy and Curation Pipeline for  
57 Analyzing Amplicon Sequence Data on the MiSeq Illumina Sequencing Platform.  
58 *Appl. Environ. Microb.* **79**: 5112-5120.
- 59 4. Edgar RC, Haas BJ, Clemente JC, Quince C, Knight R. 2011. UCHIME improves  
60 sensitivity and speed of chimera detection. *Bioinformatics* **27**: 2194-2200.
- 61 5. Mizrahi-Man O, Davenport ER, Gilad Y. 2013. Taxonomic Classification of  
62 Bacterial 16S rRNA Genes Using Short Sequencing Reads: Evaluation of Effective  
63 Study Designs. *Plos One.* **8**: e53608.

64

**Table S1. The proportion of microorganisms of each cluster in different phases**

|                 | <b>Phase I</b>    | <b>Phase II</b>   | <b>Phase III</b> |
|-----------------|-------------------|-------------------|------------------|
| <b>Cluster1</b> | <b>0.8±0.3%</b>   | <b>3.2±1.8%</b>   | <b>34.9±8.2%</b> |
| <b>Cluster2</b> | <b>17.3±15.2%</b> | <b>21.2±8.2%</b>  | <b>27.8±7.1%</b> |
| <b>cluster3</b> | <b>44.5±19.8%</b> | <b>37.3±23.4%</b> | <b>15.8±6.1%</b> |

65

66 **Figure caption**

67 **Fig. S1. The relationships among AHLs concentration, granulation and EPS production**

68 **during phase III.** The relationships during phase III were shown with a color gradient denoting

69 Pearson correlation coefficients. Granulation was determined by particle size distribution (D10,

70 D50 and D90). Significant differences were indicated as follows: \* $P < 0.05$ , \*\* $P < 0.01$ .

71

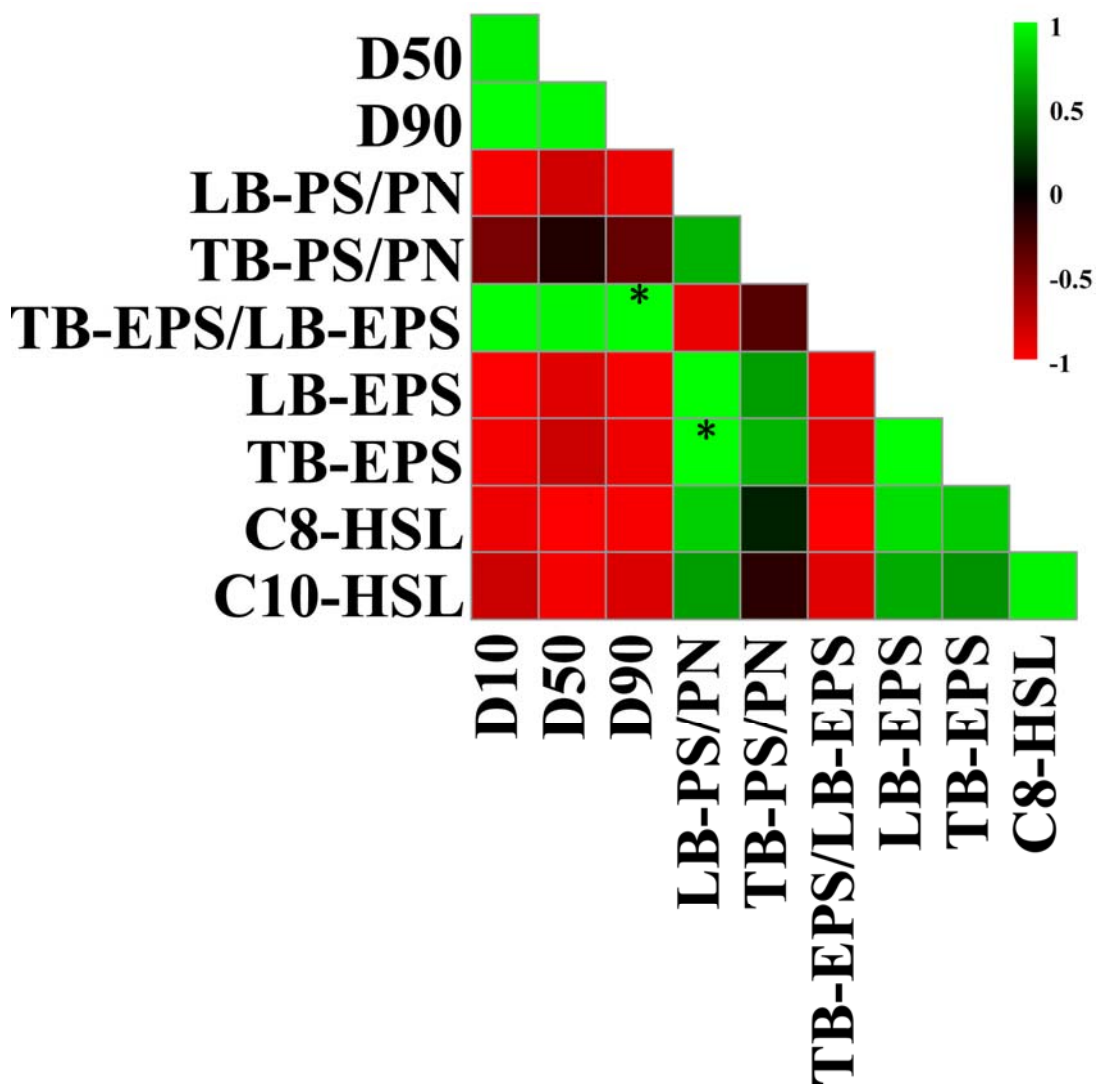

72

73 **Fig. S1. The relationships among AHLs concentration, granulation and EPS production**

74 **during phase III.** The relationships during phase III were shown with a color gradient denoting

75 Pearson correlation coefficients. Granulation was determined by particle size distribution (D10,

76 D50 and D90). Significant differences were indicated as follows: \* $P < 0.05$ , \*\* $P < 0.01$ .
